# Supplementary material for: Multiplex Analysis to Unravel the Mode of Antifungal Activity of the Plant Defensin HsAFP1 in Single Yeast Cells
Source: MDPI journal article supplement (doi:10.3390/ijms23031515), 2022-01-28
Supplement: s1 [file s1]

# Supporting information

## Multiplex analysis to unravel the mode of antifungal activity of the plant defensin HsAFP1 in single yeast cells

Caroline Struyfs<sup>1</sup>, Jolien Breukers<sup>2</sup>, Dragana Spasic<sup>2</sup>, Jeroen Lammertyn<sup>2</sup>, Bruno P.A. Cammue<sup>1</sup> and Karin Thevissen<sup>1,\*</sup>

<sup>1</sup> Centre of Microbial and Plant Genetics, KU Leuven, Kasteelpark Arenberg 20, 3001 Leuven, Belgium

<sup>2</sup> Department of Biosystems, Biosensors Group, KU Leuven, Willem de Croylaan 42, 3001 Leuven, Belgium

\* Correspondence: [karin.thevissen@kuleuven.be](mailto:karin.thevissen@kuleuven.be); Tel.: +32 16 32 96 88

**Supplementary video S1.** Video of exemplary time series of yeast cells treated with 50 µg/mL HsAFP1 stained with DHE to evaluate the induction of reactive oxygen species.

**Supplementary video S2.** Video of exemplary time series of yeast cells treated with 50 µg/mL HsAFP1 stained with SYTOX to evaluate the induction of membrane permeabilization.
